# Supplementary material
Source: PubMed Central journal article supplement (PMC3957958)
Supplement: JVI.01840-13_zjv999098753so1.pdf [file JVI.01840-13_zjv999098753so1.pdf]

| <b>Group</b> | <b>Ferret #</b> | <b>Primary influenza strain</b> | <b>HA titer to primary strain</b> | <b>Second influenza strain</b> | <b>Length of time between infections</b> | <b>DPI after last strain inoculation</b> | <b>Viral Titer of last strain</b> |
|--------------|-----------------|---------------------------------|-----------------------------------|--------------------------------|------------------------------------------|------------------------------------------|-----------------------------------|
| Naïve        | 1               | NA                              | NA                                | NA                             | NA                                       | NA                                       | NA                                |
|              | 2               | NA                              | NA                                | NA                             | NA                                       | NA                                       | NA                                |
|              | 3               | NA                              | NA                                | NA                             | NA                                       | NA                                       | NA                                |
|              | 4417            | NA                              | NA                                | NA                             | NA                                       | NA                                       | NA                                |
|              | 4420            | NA                              | NA                                | NA                             | NA                                       | NA                                       | NA                                |
| H1N1         | 472             | CA/09                           | NA                                | NA                             | NA                                       | 2                                        |                                   |
|              | 490             | CA/09                           | NA                                | NA                             | NA                                       | 2                                        |                                   |
|              | 496             | CA/09                           | NA                                | NA                             | NA                                       | 2                                        |                                   |
|              | 512             | CA/09                           | NA                                | NA                             | NA                                       | 2                                        |                                   |
|              | 491             | CA/09                           | NA                                | NA                             | NA                                       | 3                                        |                                   |
|              | 492             | CA/09                           | NA                                | NA                             | NA                                       | 3                                        |                                   |
|              | 493             | CA/09                           | NA                                | NA                             | NA                                       | 3                                        |                                   |
|              | 504             | CA/09                           | NA                                | NA                             | NA                                       | 3                                        |                                   |
|              | 509             | CA/09                           | NA                                | NA                             | NA                                       | 5                                        |                                   |
|              | 510             | CA/09                           | NA                                | NA                             | NA                                       | 5                                        |                                   |
|              | 519             | CA/09                           | NA                                | NA                             | NA                                       | 5                                        |                                   |
|              | 520             | CA/09                           | NA                                | NA                             | NA                                       | 5                                        |                                   |
|              | 476             | CA/09                           | NA                                | NA                             | NA                                       | 7                                        |                                   |
|              | 478             | CA/09                           | NA                                | NA                             | NA                                       | 7                                        |                                   |
|              | 494             | CA/09                           | NA                                | NA                             | NA                                       | 7                                        |                                   |
|              | 495             | CA/09                           | NA                                | NA                             | NA                                       | 7                                        |                                   |
|              | 480             | CA/09                           | NA                                | NA                             | NA                                       | 14                                       |                                   |
|              | 482             | CA/09                           | NA                                | NA                             | NA                                       | 14                                       |                                   |
|              | 488             | CA/09                           | NA                                | NA                             | NA                                       | 14                                       |                                   |
|              | 489             | CA/09                           | NA                                | NA                             | NA                                       | 14                                       |                                   |

| <b>Group</b>  | <b>Ferret #</b> | <b>Primary influenza strain</b> | <b>HA titer to primary strain</b> | <b>Length of time between infections</b> | <b>Second influenza strain</b> | <b>DPI after last strain inoculation</b> |
|---------------|-----------------|---------------------------------|-----------------------------------|------------------------------------------|--------------------------------|------------------------------------------|
| H5N1          | 807             | VN/04                           | NA                                | NA                                       | NA                             | 7                                        |
|               | 793             | VN/04                           | NA                                | NA                                       | NA                             | 6                                        |
|               | 801             | VN/04                           | NA                                | NA                                       | NA                             | 7                                        |
|               | 541             | VN/04                           | NA                                | NA                                       | NA                             | 6                                        |
|               | 542             | VN/04                           | NA                                | NA                                       | NA                             | 6                                        |
|               | 539             | VN/04                           | NA                                | NA                                       | NA                             | 7                                        |
|               | 544             | VN/04                           | NA                                | NA                                       | NA                             | 7                                        |
|               | 285             | VN/04                           | NA                                | NA                                       | NA                             | 2                                        |
|               | 284             | VN/04                           | NA                                | NA                                       | NA                             | 4                                        |
|               | 806             | VN/04                           | NA                                | NA                                       | NA                             | 4                                        |
|               | 796             | VN/04                           | NA                                | NA                                       | NA                             | 5                                        |
|               | 797             | VN/04                           | NA                                | NA                                       | NA                             | 5                                        |
|               | 791             | VN/04                           | NA                                | NA                                       | NA                             | 6                                        |
| H1N1/<br>H5N1 | 754             | Mex/09                          |                                   |                                          | VN/04                          | 18                                       |
|               | 74              | Mex/09                          |                                   |                                          | VN/04                          | 18                                       |
|               | 376             | Mex/09                          |                                   |                                          | VN/04                          | 18                                       |
|               | 764             | Mex/09                          |                                   |                                          | VN/04                          | 18                                       |
|               | 557             | Mex/09                          |                                   |                                          | VN/04                          | 18                                       |
|               | 646             | Mex/09                          |                                   |                                          | VN/04                          | 18                                       |
|               | 56              | Mex/09                          |                                   |                                          | VN/04                          | 18                                       |
|               | 779             | Mex/09                          |                                   |                                          | VN/04                          | 18                                       |
|               | 560             | Mex/09                          |                                   |                                          | VN/04                          | 18                                       |
|               | 718             | Mex/09                          | 1:160                             | >3 mo                                    | VN/04                          | 2                                        |
|               | 785             | Mex/09                          | 1:640                             | >3 mo                                    | VN/04                          | 2                                        |
|               | 605             | Mex/09                          | 1:1280                            | 3 mo                                     | VN/04                          | 2                                        |

|               |      |          |        |        |       |    |
|---------------|------|----------|--------|--------|-------|----|
|               | 615  | Mex/09   | 1:1280 | >3 mo  | VN/04 | 4  |
|               | 602  | Mex/09   | 1:640  | 3 mo   | VN/04 | 4  |
|               | 601  | Mex/09   | 1:640  | 3 mo   | VN/04 | 4  |
|               | 610  | Mex/09   | 1:320  | >3 mo  | VN/04 | 6  |
|               | 614  | Mex/09   | 1:320  | >3 mo  | VN/04 | 6  |
|               | 603  | Mex/09   | 1:640  | 3 mo   | VN/04 | 6  |
|               | 612  | Mex/09   | 1:320  | >3 mo  | VN/04 | 18 |
|               | 611  | Mex/09   | 1:640  | >3 mo  | VN/04 | 18 |
|               | 290  | Mex/09   | 1:2560 | 1.6 mo | VN/04 | 18 |
|               | 287  | Mex/09   | 1:2560 | 1.6 mo | VN/04 | 18 |
|               | 616  | Mex/09   | 1:2560 | 2 mo   | VN/04 | 18 |
| H3N2/<br>H5N1 | 299  | Perth/09 |        |        | VN/04 | 7  |
|               | 3291 | Vic/11   | 1:80   | >3 mo  | VN/04 | 2  |
|               | 3290 | Vic/11   | 1:80   | >3 mo  | VN/04 | 2  |
|               | 3287 | Vic/11   | 1:160  | >3 mo  | VN/04 | 2  |
|               | 3289 | Vic/11   | 1:160  | >3 mo  | VN/04 | 2  |
|               | 1129 | Vic/11   | 1:20   | >3 mo  | VN/04 | 4  |
|               | 1098 | Vic/11   | 1:80   | >3 mo  | VN/04 | 4  |
|               | 1106 | Vic/11   | 1:40   | >3 mo  | VN/04 | 4  |
|               | 1103 | Vic/11   | 1:160  | >3 mo  | VN/04 | 4  |
|               | 1105 | Vic/11   |        | >3 mo  | VN/04 | 4  |
|               | 1123 | Vic/11   | 1:40   | >3 mo  | VN/04 | 6  |
|               | 1122 | Vic/11   | 1:160  | >3 mo  | VN/04 | 6  |
|               | 1131 | Vic/11   | 1:80   | >3 mo  | VN/04 | 6  |
|               | 277  | Vic/11   |        | 1 mo   | VN/04 | 23 |
|               | 276  | Vic/11*  |        | 1 mo   | VN/04 | 23 |
|               | 262  | Vic/11*  |        | 1 mo   | VN/04 | 23 |
|               | 263  | Vic/11*  |        | 1 mo   | VN/04 | 23 |

|  |     |        |  |      |       |    |
|--|-----|--------|--|------|-------|----|
|  | 279 | Vic/11 |  | 1 mo | VN/04 | 7  |
|  | 297 | Vic/11 |  | 1 mo | VN/04 | 16 |

**Supplementary Table 1. Individual ferret information.** Six groups of ferrets were infected with the primary seasonal virus strain listed and HA titers to the corresponding primary influenza strain were measured. Ferrets recovered from the primary infection for the length of time listed and then challenged with H5N1 (VN/04). Ferrets were sacrificed at the time points listed in the last column.

| Group | Ferret # | DPI | Trachea | Bronchi | Alveoli | Submucosal glands | Small bowel epithelia | Small bowel lamina propria | Small bowel ganglia | Liver | Spleen Red Pulp | Spleen White Pulp | Brain Olfactory Bulb | Brain Cerebral Cortex | Brain Deep Gray and White Matter | Brain Brainstem | Brain Cerebellum | Brain Meninges and Ependyma | Kidney |
|-------|----------|-----|---------|---------|---------|-------------------|-----------------------|----------------------------|---------------------|-------|-----------------|-------------------|----------------------|-----------------------|----------------------------------|-----------------|------------------|-----------------------------|--------|
| Naïve | 1        | NA  | 0       | 0       | 0       | 0                 | 0                     | 0                          | 0                   | 0     | 0               | 0                 | 0                    | 0                     | 0                                | 0               | 0                | 0                           | na     |
|       | 2        | NA  | 0       | 0       | 0       | 0                 | 0                     | 0                          | 0                   | 0     | 0               | 0                 | 0                    | 0                     | 0                                | 0               | 0                | 0                           | na     |
|       | 3        | NA  | 0       | 0       | 0       | 0                 | 0                     | 0                          | 0                   | 0     | 0               | 0                 | 0                    | 0                     | 0                                | 0               | 0                | 0                           | na     |
|       | 4417     | NA  | 0       | 0       | 0       | 0                 | 0                     | 0                          | 0                   | 0     | 0               | 0                 | 0                    | 0                     | 0                                | 0               | 0                | 0                           | na     |
|       | 4420     | NA  | 0       | 0       | 0       | 0                 | 0                     | 0                          | 0                   | 0     | 0               | 0                 | 0                    | 0                     | 0                                | 0               | 0                | 0                           | na     |
| H1N1  | 472      | 2   | 0       | 2       | 1       | 3                 | 0                     | 0                          | 0                   | na    | na              | na                | 0                    | 0                     | 0                                | 0               | 0                | 0                           | na     |
|       | 490      | 2   | 1       | 3       | 2       | 3                 | 0                     | 0                          | 0                   | na    | na              | na                | 0                    | 0                     | 0                                | 0               | 0                | 0                           | na     |
|       | 496      | 2   | 1       | 0       | 0       | 0                 | 0                     | 0                          | 0                   | na    | na              | na                | 0                    | 0                     | 0                                | 0               | 0                | 0                           | na     |
|       | 512      | 2   | 1       | 1       | 0       | 0                 | 0                     | 0                          | 0                   | na    | na              | na                | 0                    | 0                     | 0                                | 0               | 0                | 0                           | na     |
|       | 491      | 3   | 0       | 1       | 0       | 0                 | 0                     | 1                          | 0                   | na    | na              | na                | 0                    | 0                     | 0                                | 0               | 0                | 0                           | na     |
|       | 492      | 3   | 1       | 0       | 0       | 3                 | 0                     | 0                          | 0                   | na    | na              | na                | 0                    | 0                     | 0                                | 0               | 0                | 0                           | na     |
|       | 493      | 3   | 0       | 2       | 1       | 3                 | 0                     | 0                          | 0                   | na    | na              | na                | 0                    | 0                     | 0                                | 0               | 0                | 0                           | na     |
|       | 504      | 3   | 1       | 1       | 0       | 3                 | 0                     | 1                          | 0                   | na    | na              | na                | 0                    | 0                     | 0                                | 0               | 0                | 0                           | na     |
|       | 509      | 5   | 2       | 2       | 0       | 3                 | 0                     | 0                          | 0                   | na    | na              | na                | 0                    | 0                     | 0                                | 0               | 0                | 0                           | na     |
|       | 510      | 5   | 1       | 2       | 1       | 3                 | 0                     | 0                          | 0                   | na    | na              | na                | 0                    | 0                     | 0                                | 0               | 0                | 0                           | na     |
|       | 519      | 5   | 2       | 1       | 0       | 2                 | 0                     | 0                          | 0                   | na    | na              | na                | 0                    | 0                     | 0                                | 0               | 0                | 0                           | na     |
|       | 520      | 5   | 2       | 2       | 3       | 3                 | 0                     | 0                          | 0                   | na    | na              | na                | 0                    | 0                     | 0                                | 0               | 0                | 0                           | na     |
|       | 476      | 7   | 0       | 0       | 0       | 0                 | 0                     | 1                          | 0                   | na    | na              | na                | 0                    | 0                     | 0                                | 0               | 0                | 0                           | na     |
|       | 478      | 7   | 0       | 0       | 0       | 0                 | 0                     | 1                          | 0                   | na    | na              | na                | 0                    | 0                     | 0                                | 0               | 0                | 0                           | na     |
|       | 494      | 7   | 0       | 0       | 0       | 0                 | 0                     | 0                          | 0                   | na    | na              | na                | 0                    | 0                     | 0                                | 0               | 0                | 0                           | na     |
|       | 495      | 7   | 0       | 0       | 0       | 2                 | 0                     | 0                          | 0                   | na    | na              | na                | 0                    | 0                     | 0                                | 0               | 0                | 0                           | na     |
|       | 480      | 14  | 0       | 0       | 0       | 0                 | 0                     | 0.5                        | 0                   | na    | na              | na                | 0                    | 0                     | 0                                | 0               | 0                | 0                           | na     |
|       | 482      | 14  | 0       | 0       | 0       | 0                 | 0                     | 1                          | 0                   | na    | na              | na                | 0                    | 0                     | 0                                | 0               | 0                | 0                           | na     |
|       | 488      | 14  | 0       | 0       | 0       | 0                 | 0                     | 1                          | 0                   | na    | na              | na                | 0                    | 0                     | 0                                | 0               | 0                | 0                           | na     |
|       | 489      | 14  | 0       | 0       | 0       | 0                 | 0                     | 2                          | 0                   | na    | na              | na                | 0                    | 0                     | 0                                | 0               | 0                | 0                           | na     |
| H5N1  | 807      | 6   | 2       | 2       | 1.5     | 0                 | 0                     | 0.5                        | 0                   | 1     | 0               | 0                 | 3                    | 3                     | 2                                | 3               | 2                | 0                           | na     |
|       | 793      | 5   | 0.5     | 0       | 2       | 0                 | 0                     | 2                          | 0                   | 2     | 0               | 2                 | 0                    | 0                     | 0                                | 3               | 2                | 0                           | na     |
|       | 801      | 8   | 0       | 0       | 1.5     | 0                 | 0                     | 3                          | 0                   | 3     | 0               | 0                 |                      |                       |                                  |                 |                  |                             | na     |
|       | 541      | 6   | 0       | 0       | 2.5     | 0                 | 0                     | 0                          | 0                   | 3     | 0               | 0                 | 3                    | 3                     | 3                                | 3               | 3                | 3                           | na     |
|       | 542      | 5   | 0       | 0       | 3       | 0                 | 0                     | 0                          | 0                   | 2     | 0               | 2                 |                      |                       |                                  |                 |                  |                             | na     |
|       | 539      | 7   | 0       | 0       | 2       | 0                 | 0                     | 0                          | 0                   | 1     | 0               | 1                 |                      |                       |                                  |                 |                  |                             | na     |
|       | 544      | 5   | 1       | 0       | 2.5     | 0                 | 0                     | 0                          | 0                   | 3     | 0               | 3                 |                      |                       |                                  |                 |                  |                             | na     |

|               |      |    |     |     |     |   |   |     |     |     |      |     |    |    |   |   |   |   |    |
|---------------|------|----|-----|-----|-----|---|---|-----|-----|-----|------|-----|----|----|---|---|---|---|----|
|               | 285  | 2  | 0   | 0   | 0   | 0 | 0 | 0   | 0   | 1   | 0    | 0   | 0  | 0  | 0 | 0 | 0 | 0 | na |
|               | 284  | 4  | 0   | 1   | 1   | 0 | 0 | 2   | 0   | 1   | 0    | 0   | 0  | 0  | 0 | 0 | 0 | 0 | na |
|               | 806  | 4  | 0   | 0   | 0   | 0 | 0 | 0   | 0   | 1   | 0    | 1   | 0  | 1  | 0 | 0 | 0 | 0 | na |
|               | 796  | 5  | 0   | 0   | 0   | 0 | 0 | 0.5 | 0   | 2   | 0    | 0   | 0  | 2  | 0 | 0 | 0 | 0 | na |
|               | 797  | 5  | 0   | 0   | 0   | 0 | 0 | 0   | 0   | 2   | 0    | 0   | NA | 2  | 0 | 0 | 0 | 1 | na |
|               | 791  | 6  | 0   | 0   | 0   | 0 | 0 | 0   | 0   | 3   | 0    | 0   | 3  | 3  | 2 | 2 | 1 | 0 | na |
| H1N1/<br>H5N1 | 754  | 18 | 0   | 0   | 0   | 0 | 0 | 2   | 0   | 0   | 1    | 0   | 0  | 0  | 0 | 0 | 0 | 0 | na |
|               | 74   | 18 | 0   | 0   | 0   | 0 | 0 | 2   | 0   | 0   | 2    | 0   | 0  | 0  | 0 | 0 | 0 | 0 | na |
|               | 376  | 18 | 0   | 0   | 0   | 0 | 0 | 1   | 0   | 0   | 2    | 0   | 0  | 0  | 0 | 0 | 0 | 0 | na |
|               | 764  | 18 | 0   | 0   | 0   | 0 | 0 | 1   | 0   | 0   | 1    | 0   | 0  | 0  | 0 | 0 | 0 | 0 | na |
|               | 557  | 18 | 0   | 0   | 0   | 0 | 0 | 2   | 0   | 0   | 1    | 0   | 0  | 0  | 0 | 0 | 0 | 0 | na |
|               | 646  | 18 | 0   | 0   | 0   | 0 | 0 | 1   | 0   | 0   | 2    | 0   | 0  | 0  | 0 | 0 | 0 | 0 | na |
|               | 56   | 18 | 0   | 0   | 0   | 0 | 0 | 2   | 0   | 1   | 1    | 0   | 0  | 0  | 0 | 0 | 0 | 0 | na |
|               | 779  | 18 | 0   | 0   | 0   | 0 | 0 | 2   | 0   | 0   | 2    | 0   | 0  | 0  | 0 | 0 | 0 | 0 | na |
|               | 560  | 18 | 0   | 0   | 0   | 0 | 0 | 1   | 0   | 0   | 1    | 0   | 0  | 0  | 0 | 0 | 0 | 0 | na |
|               | 718  | 2  | 0   | 0   | 0   | 0 | 0 | 1   | 0   | 0   |      |     | 0  | 0  | 0 | 0 | 0 | 0 | na |
|               | 785  | 2  | 0   | 0   | 0   | 0 | 0 | 0   | 0   | 0   |      |     | 0  | 0  | 0 | 0 | 0 | 0 | na |
|               | 605  | 2  | 0   | 0   | 0   | 0 | 0 | 0   | 0   | 1   |      |     | 0  | 0  | 0 | 0 | 0 | 0 | na |
|               | 615  | 4  | 0   | 0   | 0.5 | 0 | 0 | 0   | 0   | 0.5 |      |     | 0  | 0  | 0 | 0 | 0 | 0 | na |
|               | 602  | 4  | 0   | 0   | 0   | 0 | 0 | 0   | 0   | 0   |      |     | 0  | 0  | 0 | 0 | 0 | 0 | na |
|               | 601  | 4  | 0   | 0   | 0   | 0 | 0 | 0   | 0   | 2   |      |     | 0  | 0  | 0 | 0 | 0 | 0 | na |
|               | 610  | 6  | 0   | 0   | 0   | 0 | 0 | 0   | 0   | 0   |      |     | 0  | 0  | 0 | 0 | 0 | 0 | na |
|               | 614  | 6  | 0   | 0   | 0   | 0 | 0 | 1   | 0   | 0   |      |     | 0  | 0  | 0 | 0 | 0 | 0 | na |
|               | 603  | 6  | 0   | 0   | 0   | 0 | 0 | 0   | 0   | 0   |      |     | 0  | 0  | 0 | 0 | 0 | 0 | na |
|               | 612  | 18 | 0   | 0   | 0   | 0 | 0 | 0.5 | 0   | 0.5 | 1    | 2   | 0  | 0  | 0 | 0 | 0 | 0 | na |
|               | 611  | 18 | 0   | 0   | 0   | 0 | 0 | 2   | 0   | 2   | 1    | 0   | 0  | 0  | 0 | 0 | 0 | 0 | na |
|               | 290  | 18 | 0   | 0   | 0   | 0 | 0 | 1   | 0   | 0.5 | 0.5  | 0   | 0  | 0  | 0 | 0 | 0 | 0 | na |
|               | 287  | 18 | 0   | 0   | 0   | 0 | 0 | 2   | 0   | 0.5 | 0    | 0.5 | 0  | 0  | 0 | 0 | 0 | 0 | na |
|               | 616  | 18 | 0   | 0   | 0   | 0 | 0 | 2   | 0   | 0   | 0    | 1   | 0  | 0  | 0 | 0 | 0 | 0 | na |
| H3N2/<br>H5N1 | 299  | 7  | 0   | 0   | 1   | 0 | 0 | 2   | 0   | 0   | 2    | 1   |    |    |   |   |   |   | na |
|               | 3291 | 2  | 0.5 | 0   | 1   | 0 | 0 | 0   | 0   | 3   | 0.75 | 1   | 0  | 0  | 0 | 0 | 0 | 0 | 0  |
|               | 3290 | 2  | 0   | 0.5 | 1   | 0 | 0 | 1   | 0   | 0.5 | 0.5  | 1   | 0  | 0  | 0 | 0 | 0 | 0 | 0  |
|               | 3287 | 2  | 0   | 0   | 0.5 | 0 | 0 | 1   | 0.5 | 0.5 | 0    | 1   | 0  | 0  | 0 | 0 | 0 | 0 | 0  |
|               | 3289 | 2  | 0   | 0   | 0   | 0 | 0 | 0   | 0   | 0   | 0    | 0   | 0  | 0  | 0 | 0 | 0 | 0 | 0  |
|               | 1129 | 4  | 0   | 0.5 | 3   | 0 | 0 | 1   | 0   | 3   | 3    | 1.5 | 0  | .5 | 0 | 1 | 1 | 0 | 2  |

|  |      |    |   |   |      |   |   |   |   |     |     |     |     |     |   |   |   |     |   |
|--|------|----|---|---|------|---|---|---|---|-----|-----|-----|-----|-----|---|---|---|-----|---|
|  | 1098 | 4  | 0 | 0 | 0    | 0 | 0 | 0 | 0 | 1   | 0   | 1   | 2.5 | 0   | 0 | 0 | 0 | 0   | 0 |
|  | 1106 | 4  | 1 | 0 | 0.75 | 0 | 0 | 0 | 0 | 1   | 0   | 2   | 3   | 0   | 0 | 1 | 0 | 1   | 0 |
|  | 1103 | 4  | 0 | 0 | 1    | 0 | 0 | 0 | 0 | 3   | 0   | .5  | 0   | 1.5 | 0 | 0 | 0 | 0   | 0 |
|  | 1105 | 4  | 0 | 0 | 0    | 0 | 0 | 0 | 0 | 1   | 0   | 2   | 3   | 2   | 2 | 1 | 2 | 0   | 0 |
|  | 1123 | 6  | 0 | 0 | 0    | 0 | 0 | 0 | 0 | 2   | 0   | 0.5 | 0   | 0   | 1 | 2 | 0 | 2   | 0 |
|  | 1122 | 6  | 0 | 0 | 0    | 0 | 0 | 0 | 0 | 0.5 | 0   | 0   | 0.5 | 2   | 2 | 1 | 0 | 0.5 | 0 |
|  | 1131 | 6  | 0 | 0 | 0    | 0 | 0 | 0 | 0 | 1   | 0.5 | 0   | 3   | 0   | 0 | 0 | 0 | 0   | 0 |
|  | 277  | 23 | 0 | 0 | 0    | 0 | 0 | 0 | 0 | 1   | 0   | 0   | 0   | 0   | 0 | 0 | 0 | 0   | 0 |
|  | 276  | 23 | 0 | 0 | 0    | 0 | 0 | 0 | 0 | 0   | 0   | 0   | 0   | 0   | 0 | 0 | 0 | 0   | 0 |
|  | 262  | 23 | 0 | 0 | 1    | 0 | 0 | 0 | 0 | 2   | 0   | 2   | 0   | 0   | 0 | 0 | 0 | 0   | 0 |
|  | 263  | 23 | 0 | 0 | 0    | 0 | 0 | 0 | 0 | 2   | 0   | 0   | 0   | 0   | 0 | 0 | 0 | 0   | 0 |
|  | 279  | 7  | 2 | 3 | 2    | 3 | 0 | 1 | 0 | 2   | 0   | 2   |     | 1   | 0 | 0 | 0 | 3   | 0 |
|  | 297  | 16 | 0 | 0 | 0    | 0 | 0 | 0 | 0 | 0   | 0   | 0   | 0   | 0   | 0 | 0 | 0 | 0   | 0 |

**Suppelementary Table 2. Distribution of viral infection in various organs as assessed by in situ hybridization (ISH) in individual ferrets.** Column 1 (**Group**) describes viral infection groups. Column 2 (**Ferret #**) describes the individual ferret number, and column 3 (**DPI**) the number of days post infection that the animals were sacrificed. Remaining columns indicate the ISH score of the organ or sub-region that showed influenza RNA. Scoring was performed as described in the materials and methods. Abbreviations: NA, not applicable; na, not available.
